# Supplementary material for: COVID-19 predictability in the United States using Google Trends time series
Source: PubMed Central journal article supplement (PMC7692493; doi:10.1038/s41598-020-77275-9), 2020-11-26
Supplement: 41598_2020_77275_MOESM1_ESM.pdf [file 41598_2020_77275_MOESM1_ESM.pdf]

## Supplementary Material for

# “COVID-19 predictability in the United States using Google Trends time series”

**Amaryllis Mavragani<sup>1,\*</sup> and Konstantinos Gkillas<sup>2</sup>**

<sup>1</sup>*Department of Computing Science and Mathematics, Faculty of Natural Sciences, University of Stirling, Stirling, FK9 4LA, Scotland, UK*

<sup>2</sup>*Department of Business Administration, University of Patras, Patras, Greece; [gillask@upatras.gr](mailto:gillask@upatras.gr)*

*\*[amaryllis.mavragani1@stir.ac.uk](mailto:amaryllis.mavragani1@stir.ac.uk)*

This file consists of the functions and the programs used in the statistical analysis.

```
1 #####
2 #####
3 #####
4 #####
5 #####
6 #####
7 # Author: Dr. Konstantinos Gkillas, University of Patras
8 # Email: gillask@upatras.gr
9 # Project: Exploring COVID-19 predictability in USA by analyzing Google Trends time series
10 #####
11 #####
12 #####
13 #####
14 #####
15 #####
16 #####
17
18 # Functions
19 bcorrelation<-function(data,ind){
20 # Change type="pearson" for Pearson correlation
21 x<-data[ind,1]
22 y<-data[ind,2]
23 m <- cbind(x, y)
24 rc<-cor(m, method="kendall", use="pairwise")
25 ro<-rc[1,2]
26 return(ro)
27 }
28
29 convert.z.score<-function(zB, one.sided=NULL) {
30 if(is.null(one.sided)) {
31 pval = pnorm(-abs(zB));
32 pval = 2 * pval
33 } else if(one.sided=="-") {
34 pval = pnorm(zB);
35 } else {
36 pval = pnorm(-zB);
37 }
38 return(pval);
39 }
40
41 bs <- function(data,ind,formula) {
42 d <- data[ind,]
43 fit <- rq(formula, tau=T, data=d)
44 return(coef(fit))
45 }
46 #####
47 #####
48 #####
49 #####
50 #####
51 #####
52 #####
53 #####
54 #####
55 #####
56 #####
57 #####
58 #####
59 #####
60 #####
61 #####
62 #####
63 #####
64 #####
65 #End
66
```

```

1 #####
2 #####
3 #####
4 #####
5 #####
6 #####
7 # Author: Dr. Konstantinos Gkillas, University of Patras
8 # Email: gillask@upatras.gr
9 # Project: Exploring COVID-19 predictability in USA by analyzing Google Trends time series
10
11 #####
12 #####
13 #####
14 #####
15 #####
16 #####
17
18 # Language used by R to display the error messages
19 Sys.setenv(LANG = "en")
20 # Suppression of all data in the R memory
21 rm(list=ls())
22 # Clear the console in RStudio
23 cat("\014")
24 # R packages used in the program and the functions
25 library(xlsx)
26 library(Hmisc)
27 library(goft)
28 library(Hmisc)
29 library(boot)
30 library(quantreg)
31 # To be changed by the user
32 date_execution = "00_00_00"
33 # Starting date
34 # The duration of the program is proportional to the number of bootstrap simulations
35 starting_time = Sys.time()
36 Time <- paste("Starting time of the process:", starting_time)
37 write(Time, file=Time, append = TRUE) # Writing in the same file (use of "Append = TRUE")
38 write("", file=Time, append = TRUE)
39 #####
40 #####
41 #####
42 #####
43 #####
44 #####
45 #Read bivariate data as a matrix
46 attach(Dataset)
47 #y Dependent variable e.g. Total Deaths/Total Cases
48 #x Explanatory variable e.g. Google trends
49 #x<-(x-mean(x))/sd(x)
50 #y<-(y-mean(y))/sd(y)
51 #Check also the number of lags needed
52 xm<-as.matrix(xm)
53 # Define the number of replications
54 R1=999
55 #####
56 #####
57 #####
58 #####
59 #####
60 #####
61 # Bias corrected correlations
62 tbnvarpi<- boot(xm, statistic=bcorrelation, R=R1,sim = "balanced")
63 z1<-tbnvarpi$t
64 bnvarpi<-mean(z1)
65 # Change type="pearson"
66 rcc<-cor(xm, method="kendall", use="pairwise")
67 roo<-rcc[1,2]
68 # Bias corrected estimators
69 bpC<-(2*roo)-bnvarpi
70 spC<-sd(z1)
71
72 # Wald Test Null, r=0
73 w1<-abs(bpC/spC)
74 p_Value_w1<-convert.z.score(w1, one.sided=NULL)
75
76 #####
77 #####
78 #####
79 #####
80 #####
81 #####
82 #Bias corrected regressions
83 T<-0.5
84 Bootreg <-boot(data=Dataset,statistic=bs,
85 # Numer of lags considered
86 formula=y-y1+x,R=R1,sim = "balanced")
87 b0<-Bootreg$t0[1]
88 b1<-Bootreg$t0[2]
89 b2<-Bootreg$t0[3]

```

```
90 #Bias corrected estimators
91 b0C<-(2*b0)-mean(Bootreg$t[,1])
92 b1C<-(2*b1)-mean(Bootreg$t[,2])
93 b2C<-(2*b2)-mean(Bootreg$t[,3])
94 sb0C<-sd(Bootreg$t[,1])
95 sb1C<-sd(Bootreg$t[,2])
96 sb2C<-sd(Bootreg$t[,3])
97 #T-tests
98 T0<-b0C/sb0C
99 T1<-b1C/sb1C
100 T2<-b2C/sb2C
101 #####
102 #####
103 #####
104 #####
105 #####
106 #####
107 #####
108 #####
109 #####
110 #####
111 #####
112 #####
113 #End
```
